# Supplementary material
Source: Royal Society of Chemistry journal article supplement (https://www.rsc.org/suppdata/dt/1999/2769/903699gt2.doc)
Supplement: Supplementary file 1 [file 903699gt2.doc]

**Supplementary Material**

**Table 2. Spectroscopic Data and Characterization of Derivatives of 2‑Substituted**

**Benzoxazole.**

**Analysis(%)**

**Compd. MP/C M+ H(CDC13)a C(CDCl3)a** C H **N**

**IIa 102 195 7.346, 7.455, 110.6, l20.0, 124.6, 125.1, 79.93 4.67 7.25**

**7.782, 8.265 127.2, 128.9, 131.5, 142.25 (79.98) (4.65) (7.17)**

**150.8, 163.1**

**IIb 98 229 7.431, 7.629, 112.75 120.5,126.3,127.5, 68.33 3.58 6.53**

**7.7225 7.783, 128.4, 130.0, 130.5, 133.0 (67.99) (3.51) (6.10)**

**8.246 144.3, 150.4,165.1**

**IIe 103 209 2.402, 7.0735 22.25 110.6, 120.6, 126.9, 80.25 5.36 6.70**

**7.3655 7.4745 128.1, 128.3, 129.5, 132.0, (80.36) (5.30) (6.69)**

**8.158 13 5.1, 143.0, 149.7, 163.8**

**IId 146 229 7.300, 7.420, 111.3, 120.8, 125.4, 126.0 68.12 3.54 6.41**

**7.494,7.687, 126.4, 129.5, 130.0, 130.5 (67.99) (3.51) (6.10)**

**8.109 142.7, 151.5, 162.8**

**IIe 114 209 2.3475 7.2475 22.29, 111.2, 120.5, 125.1, 125.5, 80.02 5.37 6.70**

**7.481, 7.706, 128.3, 129.3, 130.3, 130.4,130.5, (80.36) (5.30) (6.69)**

**8.061 134.9, 142.9, 151.4, 164.0**

**If 112 211 7.455, 7.572, 123.2, 124.4, 126.7, 127.7,**

**7.611, 8.051, 128.6, 130.5, 130.6, 132.4,**

**8.082, 8.152 134.9, 146.3, 155.55 168.7**

**33**
